# Supplementary material for: Mg-modified graphitic carbon nitride/converter slag composites as an efficient photocatalyst for sugar conversion
Source: Royal Society of Chemistry journal article supplement (doi:10.1039/d4se00209a), 2024-01-01
Supplement: d4se00209a1.pdf [file d4se00209a1.pdf]

## Electronic Supplementary Materials (ESI)

### Mg-modified graphitic carbon nitride/converter slag composite as an efficient photocatalyst for sugar conversion

Assadawoot Srikhaow, Chitiphon Chuaicham, Jirawat Trakulmututa, Kaiqian Shu and Keiko Sasaki\*

Department of Earth Resources Engineering, Kyushu University, Fukuoka, 819-0395, Japan. Email: [keikos@mine.kyushu-u.ac.jp](mailto:keikos@mine.kyushu-u.ac.jp)

#### Chemicals

Dicyandiamide (DA, 99%) were supplied by KISHIDA Chemical Co., Ltd, Japan. D-glucose (anhydrous, 99%), Ethanol (99.5%), sodium hydroxide (NaOH, 97%), magnesium chloride hexahydrate ( $\text{MgCl}_2 \cdot 6\text{H}_2\text{O}$ , 97%), sulfuric acid (95%), ethylenediaminetetraacetic acid disodium salt (EDTA-2Na, 99.5%), para-benzoquinone (BQ, 98%), tryptophan (TRP, 99%), and isopropyl alcohol (IPA, 99.7%) were purchased from FUJIFILM Wako Pure Chemical Corp., Japan.

#### Photocatalytic experiments

The glucose conversion and the lactic acid yield were calculated using the following equations<sup>1</sup>:

$$\text{Glucose conversion (\%)} = \left(1 - \left(\frac{\text{Molar of glucose after the reaction}}{\text{Molar of initial glucose}}\right)\right) \times 100 \quad (1)$$

$$\text{Lactic acid yield (\%)} = \frac{3 \times \text{Molar of lactic acid in the reaction}}{6 \times \text{Molar of initial glucose}} \times 100 \quad (2)$$

**Table S1. Chemical compositions of converter slag (CS) by XRF analysis.**

| Composition                    | (%)   |
|--------------------------------|-------|
| CaO                            | 45.08 |
| Fe <sub>2</sub> O <sub>3</sub> | 25.52 |
| SiO <sub>2</sub>               | 12.62 |
| Al <sub>2</sub> O <sub>3</sub> | 7.55  |
| MgO                            | 4.18  |
| P <sub>2</sub> O <sub>5</sub>  | 2.36  |
| MnO                            | 1.55  |
| TiO <sub>2</sub>               | 0.36  |
| SO <sub>3</sub>                | 0.23  |

**Note:** The chemical compositions of CS with concentration lower than 0.05% are not included.

**Table S2. Full width at half maximum (FWHM) calculation of all CN-based samples from XRD results.**

| Sample      | FWHM from 002 plan of g-C <sub>3</sub> N <sub>4</sub> |
|-------------|-------------------------------------------------------|
| Pure CN     | 1.224°                                                |
| CN/CS       | 1.390°                                                |
| 2.3Mg-CN/CS | 1.454°                                                |
| 4.7Mg-CN/CS | 1.555°                                                |
| 7.1Mg-CN/CS | 1.678°                                                |

**Table S3. Surface area ( $S_{\text{BET}}$ ), pore volume and average pore diameter of all as-prepared samples.**

| Sample      | $S_{\text{BET}}$<br>(m <sup>2</sup> g <sup>-1</sup> ) | Pore volume<br>(cm <sup>3</sup> g <sup>-1</sup> ) | Average pore diameter<br>(nm) |
|-------------|-------------------------------------------------------|---------------------------------------------------|-------------------------------|
| CS          | 5                                                     | 0.0026                                            | 22.14                         |
| CN          | 10                                                    | 0.0784                                            | 33.32                         |
| 4.6Mg-CN    | 11                                                    | 0.0897                                            | 34.17                         |
| CN/CS       | 16                                                    | 0.1195                                            | 29.53                         |
| 2.3Mg-CN/CS | 17                                                    | 0.1481                                            | 34.24                         |
| 4.7Mg-CN/CS | 21                                                    | 0.2130                                            | 41.39                         |
| 7.1Mg-CN/CS | 25                                                    | 0.2510                                            | 40.16                         |

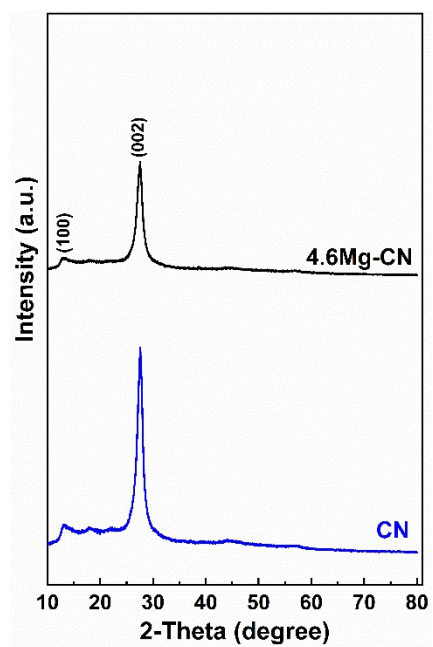

**Fig. S1** XRD diffraction patterns pure CN and 4.6Mg-CN.

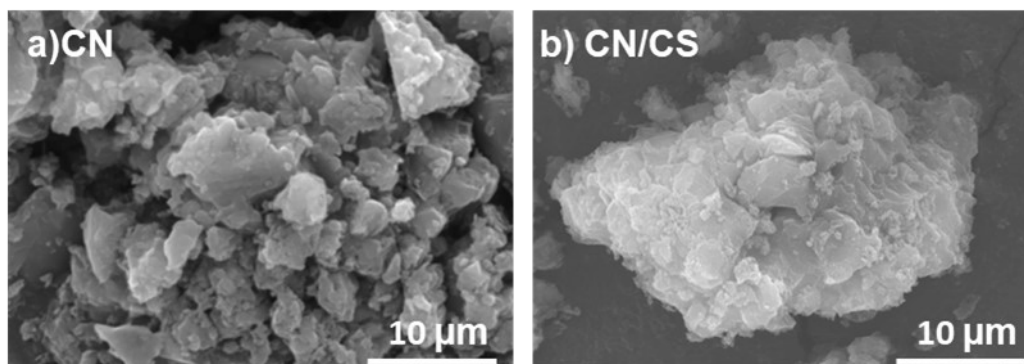

**Fig. S2** SEM images of a) pure CN and (b) CN/CS.

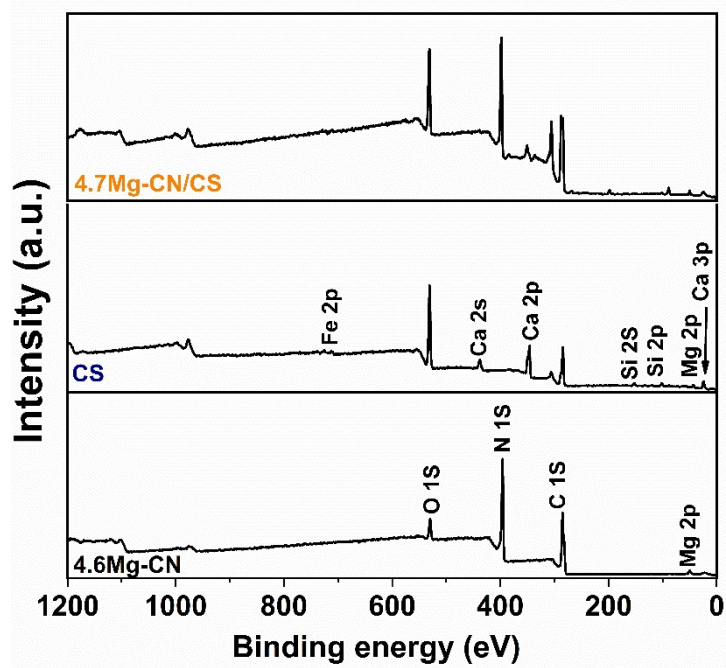

Fig. S3 XPS survey spectra of 4.6Mg-CN, pure CS and 4.7Mg-CN/CS.

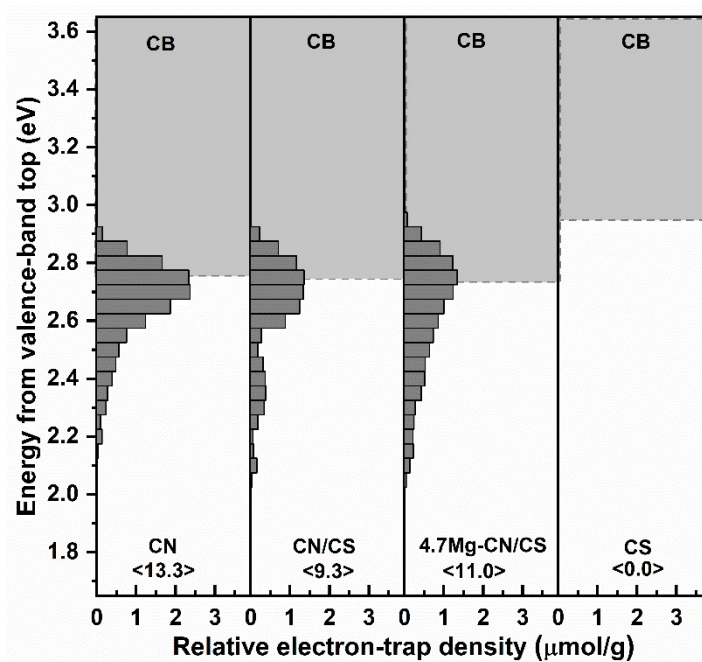

Fig. S4 the energy-resolved distribution of electron traps (ERDT) patterns of CN, CN/CS, 4.7Mg-CN/CS and CS samples.

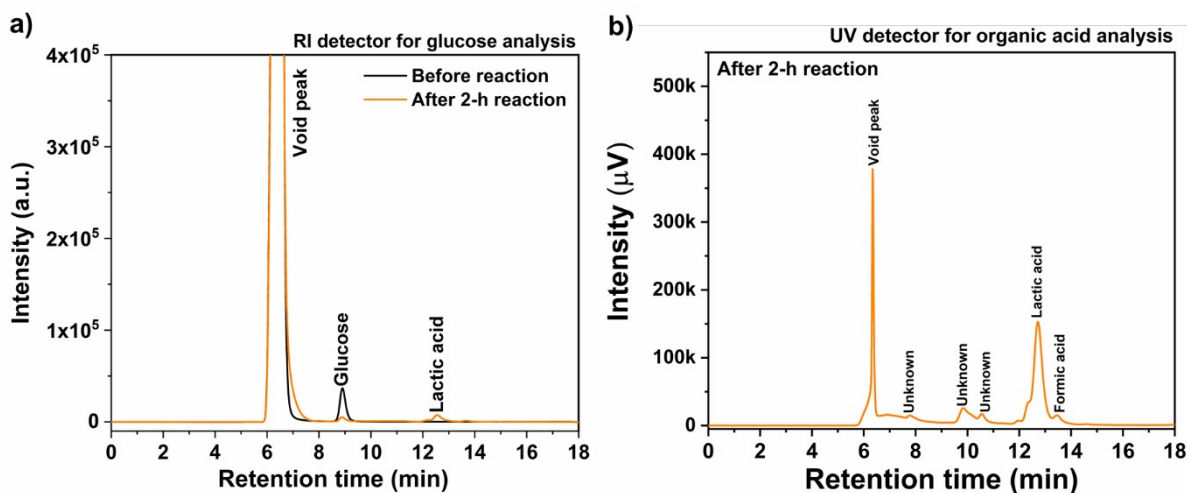

**Fig. S5** HPLC chromatograms of glucose solution after photocatalytic production of lactic acid by 4Mg-CN/CS under visible-light irradiation for 2 h; (a) glucose and (b) lactic acid analysis.

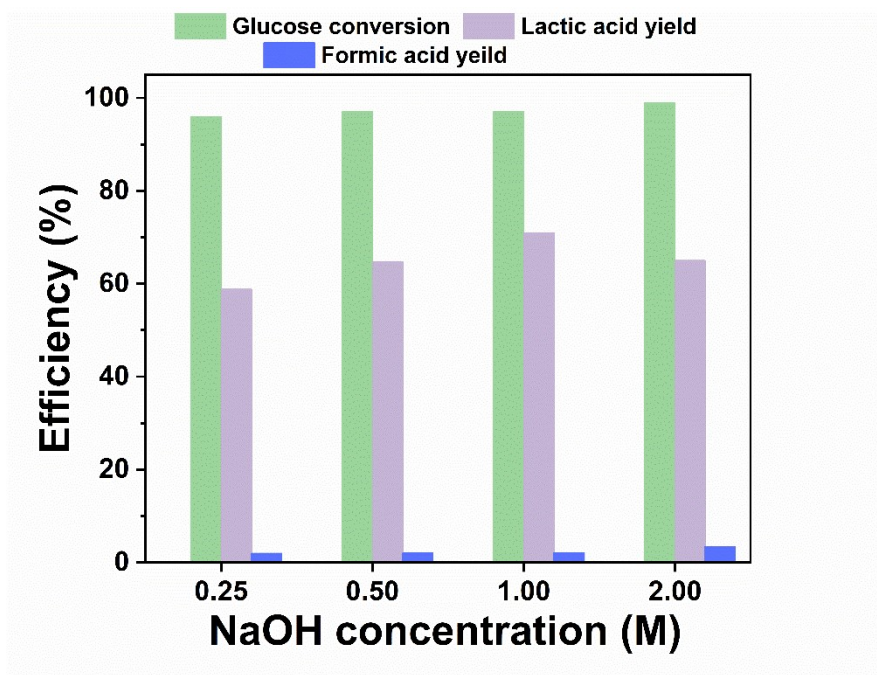

**Fig. S6** effect of NaOH concentration on the photocatalytic conversion of glucose by the 4.7Mg-CN/CS composite under the visible-light irradiation at 50 °C after 120 min.

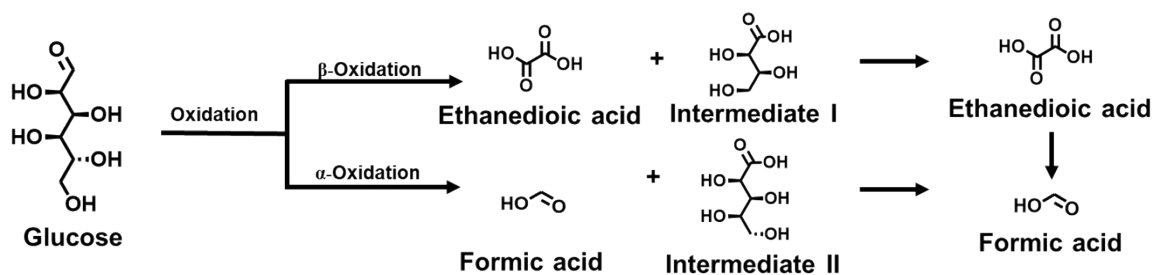

**Fig. S7** Possible side reaction pathways of glucose conversion through  $\alpha$  and  $\beta$  oxidation yielding formic acid as a by-product.

## Reference

1. A. Onda, T. Ochi, K. Kajiyoshi and K. Yanagisawa, *Applied Catalysis A: General*, 2008, **343**, 49-54.
